# Supplementary material
Source: ML conference proceedings conference paper supplement (https://aclanthology.org/D18-1054)
Supplement: Attachment [file D18-1054.Attachment.zip]

## A Model output

Table 1 shows example outputs from our model. They are derived from our devset with document article ID pairs as follows: document=127e1efe32-b11e606a0c-8f49a2399a-bb4a52f9d9, article ID=1,3; and document=ebfad83ccf-1214df5664-32798c54de-b17e91d958, article id=2. The first example indicates the soundness of complete sentence as answer (beheaded vs she is beheaded). The second example represents the importance of answer synthesizing when answer is not exactly present as span in the document. The third example shows the importance of multi-sentence attention in Context Zoom layer.

| Article ID | Document                                                                                                                                                                                                                                                                                                                                                                                                                             | Question                                                  | Model Output    | Groundtruth     | AEPD | MSRA |
|------------|--------------------------------------------------------------------------------------------------------------------------------------------------------------------------------------------------------------------------------------------------------------------------------------------------------------------------------------------------------------------------------------------------------------------------------------|-----------------------------------------------------------|-----------------|-----------------|------|------|
| 1          | In 1585, Catholic Spain ruled by ... the throne will pass to her cousin, Mary ...Elizabeth learns of Mary's involvement in the plot, and Walsingham insists Mary be executed to quell any possible revolt.Elizabeth is reluctant ... Mary is tried for high treason and is beheaded, after ascending the block in a blood-red dress (red being the Catholic liturgical color for martyrs). Walsingham sees that this was part of ... | How is Mary Killed?                                       | She is beheaded | She is beheaded | No   | No   |
| 2          | The action covers a period of roughly four months ... Seemingly without considering either the moral implications ... When she finally gets there, Jim is aggressive towards her for being late. Without really intending to, he hits her across the face ... and gives her a black eye. Soon the situation deteriorates completely. Mrs Blakeston, ...                                                                              | How does Liza get a black eye?                            | Jim hits her    | Jim hits her    | No   | Yes  |
| 3          | In 1585, Catholic Spain ruled by King Philip II of Spain (Jordi Molla) is the most powerful country in the world.Seeing Protestant England as a threat ... He plans to take over England and make his daughter, Isabella, the Queen of England in Elizabeth's place. Meanwhile, Elizabeth I of England (Cate Blanchett) is ...                                                                                                       | Who does King Philip intend to make the Queen of England? | Isabella        | Isabella        | Yes  | Yes  |

Table 1: The predictions are from our model ConZNet (SS=5). Due to space constraints we showed only two selected sentence (blue in color). The Last two columns Answer Exactly Present in the Document(AEPD), Multiple Sentences Required to Answer (MSRA) shows the importance of our hybrid approach of Answer Generation and *Context Zoom* layer which captures intra sentence relations while zooming.
